# Supplementary material
Source: PubMed Central journal article supplement (PMC4249584)

Figure E1. In-hospital mortality based on diagnosis at transplant. *CHD*, Congenital heart disease; *PGE*, prostaglandin E.

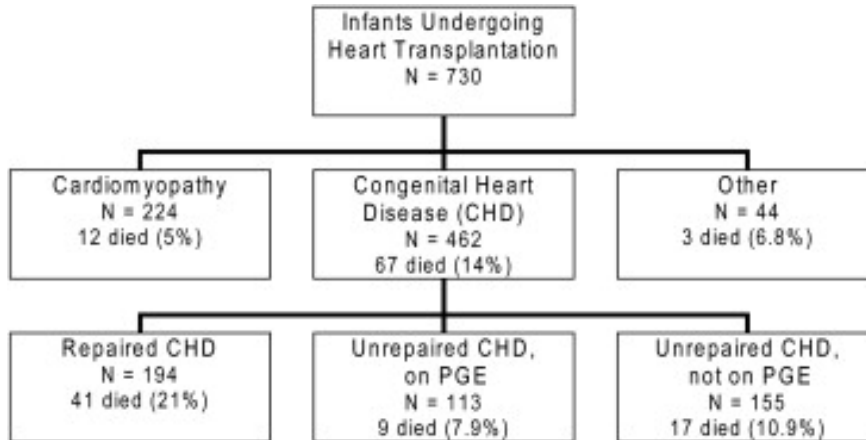

Supplement: NIHMS643709-supplement-Suppl_Fig_E1.pdf [file NIHMS643709-supplement-Suppl_Fig_E1.pdf]
