# Supplementary material
Source: PubMed Central journal article supplement (PMC4249584)

Figure E2. Ten-year trend in status 1A listing among US infants at time of heart transplantation. The number of infants listed status 1A has increased and now almost all infants receive heart transplantation as status 1A.

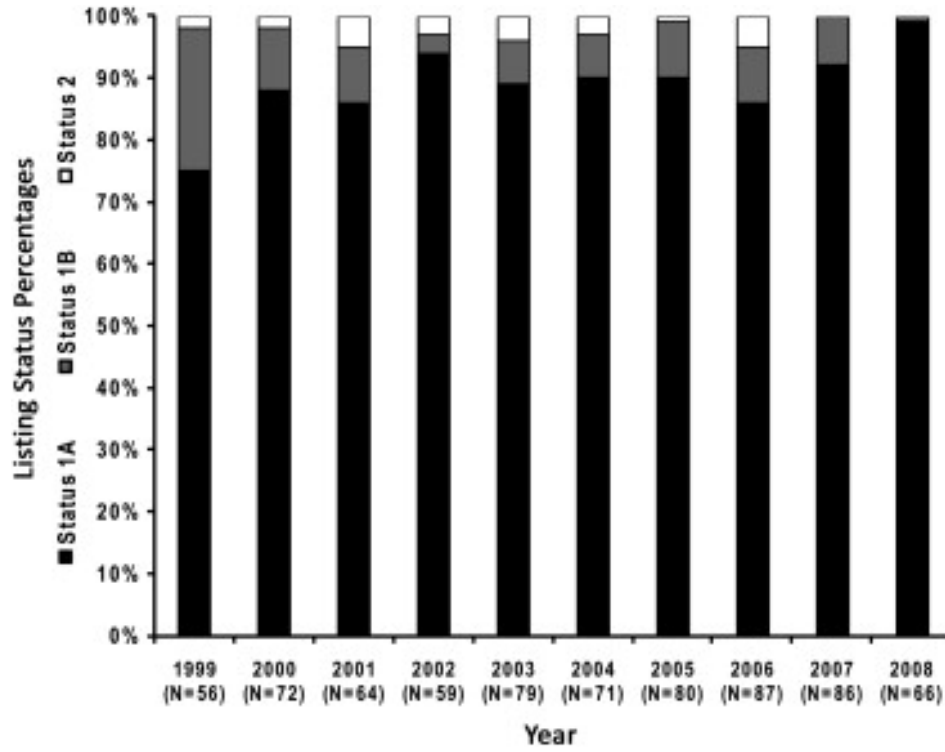

Supplement: NIHMS643709-supplement-Suppl_Fig_E2.pdf [file NIHMS643709-supplement-Suppl_Fig_E2.pdf]
