# Supplementary material
Source: PubMed Central journal article supplement (PMC4249584)
Supplement: NIHMS643709-supplement-Suppl_Table_E2.pdf [file NIHMS643709-supplement-Suppl_Table_E2.pdf]

Table E2.

| Univariate analysis of factors associated with death after hospital discharge* |                     |               |                |
|--------------------------------------------------------------------------------|---------------------|---------------|----------------|
|                                                                                | <b>Hazard ratio</b> | <b>95% CI</b> | <b>P value</b> |
| Diagnostic category                                                            |                     |               |                |
| Repaired CHD <sup>†</sup>                                                      | 0.9                 | (0.6, 1.7)    | .87            |
| Unrepaired CHD, with PGE <sup>†</sup>                                          | 1.0                 | (0.6, 1.8)    | .97            |
| Unrepaired CHD, no PGE <sup>†</sup>                                            | 1.4                 | (0.9, 2.3)    | .15            |
| Advanced support                                                               |                     |               |                |
| ECMO                                                                           | 2.5                 | (1.4, 4.4)    | .001           |
| Ventilator                                                                     | 1.3                 | (0.8, 2.0)    | .25            |
| Renal function                                                                 |                     |               |                |
| Dialysis at time of transplant                                                 | 0.9                 | (0.1, 6.1)    | .88            |
| Creatinine clearance < 40 mL · min <sup>-1</sup> · m <sup>-2</sup>             | 1.1                 | (0.7, 1.9)    | .64            |
| Creatinine value not reported                                                  | 1.6                 | (0.8, 3.1)    | .20            |

*CI*, Confidence intervals; *CHD*, congenital heart disease; *PGE*, prostaglandin E; *ECMO*, extracorporeal membrane oxygenation.

\* All clinical variables defined at the time of heart transplantation.

† Reference group is structurally normal hearts (cardiomyopathy + other).
